# Supplementary material for: Electronic structure of triangular M3 (M = B, Al, Ga): nonclassical three-center two electron π bond and σ delocalization
Source: Royal Society of Chemistry journal article supplement (doi:10.1039/d0cp02594a), 2020-01-01
Supplement: d0cp02594a1.pdf [file d0cp02594a1.pdf]

**Supporting Information for**  
**Organocatalysis by halogen, chalcogen, and pnictogen bond**  
**donors in halide abstraction reactions: an alternative to**  
**hydrogen bond based catalysis**

Guangxia Li<sup>[a]</sup>, Lingpeng Meng<sup>[a]</sup>, Huaiyu Zhang<sup>[a]</sup>, Xiaoyan Li<sup>\*[a]</sup>, Yanli Zeng<sup>\*[a,b]</sup>

<sup>a</sup> Institute of Computational Quantum Chemistry, College of Chemistry and Material Science,  
Hebei Normal University, Shijiazhuang 050024, P. R. China

<sup>b</sup>National Demonstration Center for Experimental Chemistry Education (Hebei Normal  
University), Shijiazhuang 050024, P. R. China

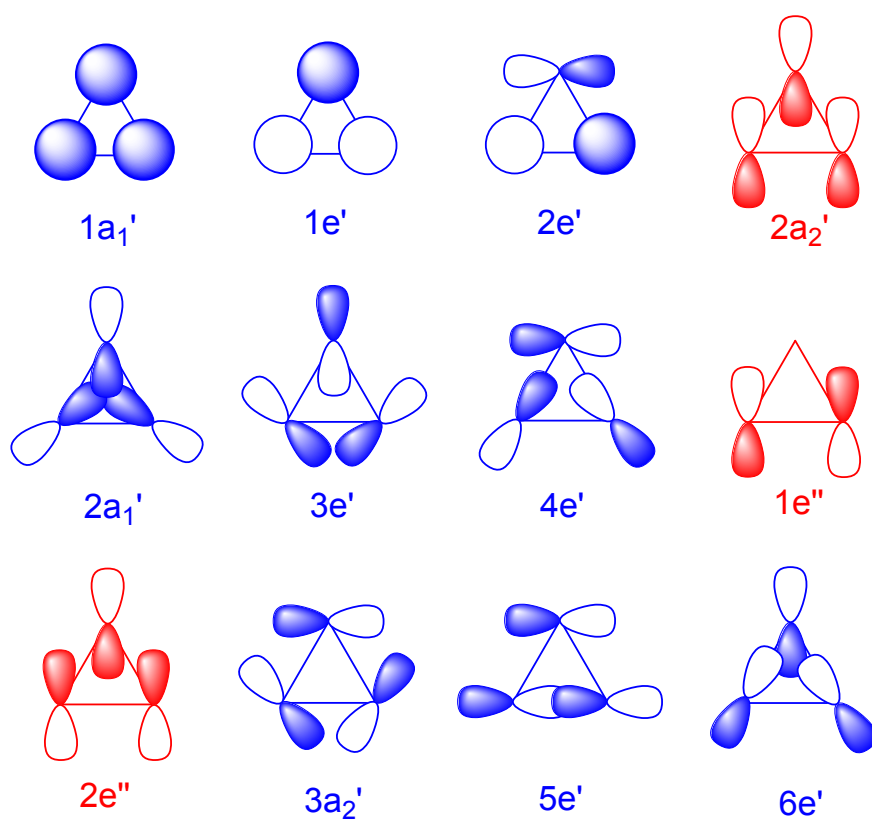

Figure S. The active orbitals in CASSCF calculations.
